# Supplementary material
Source: PubMed Central journal article supplement (PMC2712023)
Supplement: mmc1.pdf [file mmc1.pdf]

## SUPPLEMENTARY INFORMATION

### **Ranaspumin-2: structure and function of a surfactant protein from the foam nests of a tropical frog**

Cameron D. Mackenzie<sup>1</sup>, Brian O. Smith<sup>2</sup>, Annette Meister<sup>3</sup>, Alfred Blume<sup>3</sup>, Xiubo Zhao<sup>4</sup>, Jian R. Lu<sup>4</sup>, Malcolm W. Kennedy<sup>5</sup>, and Alan Cooper<sup>1\*</sup>

<sup>1</sup> WestChem Department of Chemistry, Joseph Black Building, University of Glasgow, Glasgow G12 8QQ, Scotland, UK

<sup>2</sup> Faculty of Biomedical and Life Sciences, Biochemistry & Cell Biology, Joseph Black Building, University of Glasgow, Glasgow G12 8QQ, Scotland, UK

<sup>3</sup> Martin Luther University Halle-Wittenberg, Institute of Chemistry - Physical Chemistry, 06108 Halle/Saale, Germany

<sup>4</sup> Biological Physics Group, School of Physics & Astronomy, University of Manchester, Manchester M13 9PL, UK

<sup>5</sup> Faculty of Biomedical and Life Sciences, Ecology & Evolutionary Biology, Graham Kerr Building, University of Glasgow, Glasgow G12 8QQ, Scotland, UK

**Author contributions:** AC and MWK devised and managed the project; CDM prepared and characterized the protein and, with BOS, determined the NMR structure; IRRAS was done by AM and AB, and neutron reflection by XZ and JRL; AC proposed the clam-shell unfolding model and wrote the paper, in collaboration with other authors.

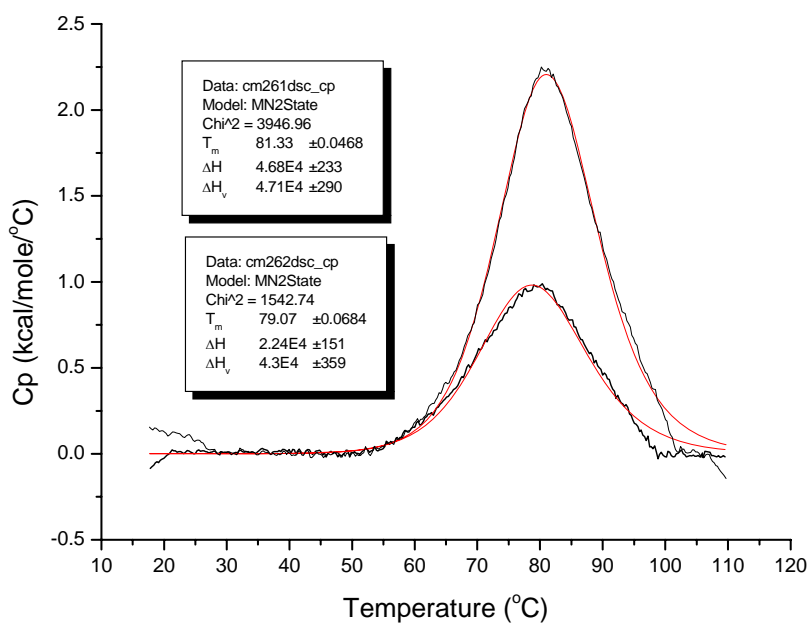

**Figure S1:** DSC of thermal unfolding of recombinant Rsn-2 in 20mM phosphate buffer, pH 7. The upper trace shows the cooperative endothermic response typical of a cooperative 2-state unfolding transition of a monomeric protein. The lower trace is a re-scan after cooling *in situ*, showing partial refolding of the protein even after heating to 110 °C. The ratio of van't Hoff to calorimetric enthalpies ( $\Delta H_{VH}/\Delta H_{cal} = 1.01$  for first scan) is consistent with cooperative 2-state unfolding of a protein monomer under these conditions.

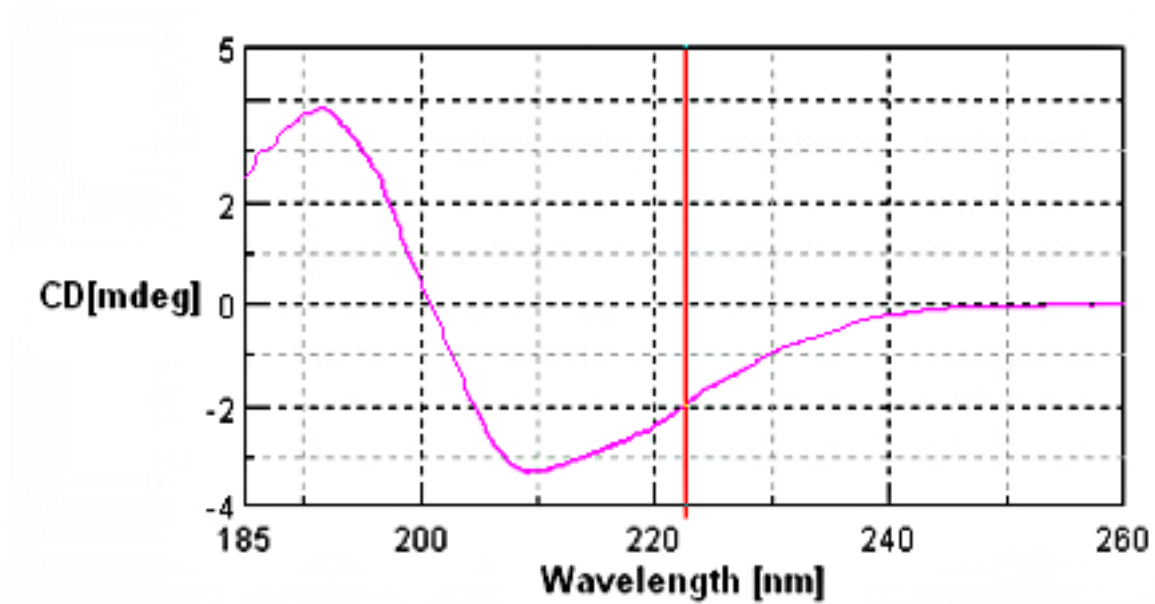

**Figure S2:** Far-UV circular dichroism (CD) spectrum of recombinant Rsn-2 in 20mM phosphate buffer, pH 7.

|                  | <b>Contin</b> | <b>Selcon 3</b> | <b>Solution Structure</b> |
|------------------|---------------|-----------------|---------------------------|
| <b>Helix</b>     | 11%           | 17%             | 14%                       |
| <b>Strand</b>    | 36%           | 35%             | 35%                       |
| <b>Turn</b>      | 21%           | 19%             | 19%                       |
| <b>Unordered</b> | 32%           | 29%             | 32%                       |

**Table S1:** Comparison of secondary structure content of Rsn-2 in solution estimated from Contin or Selcon 3 analysis of CD spectra, or from the NMR structure.

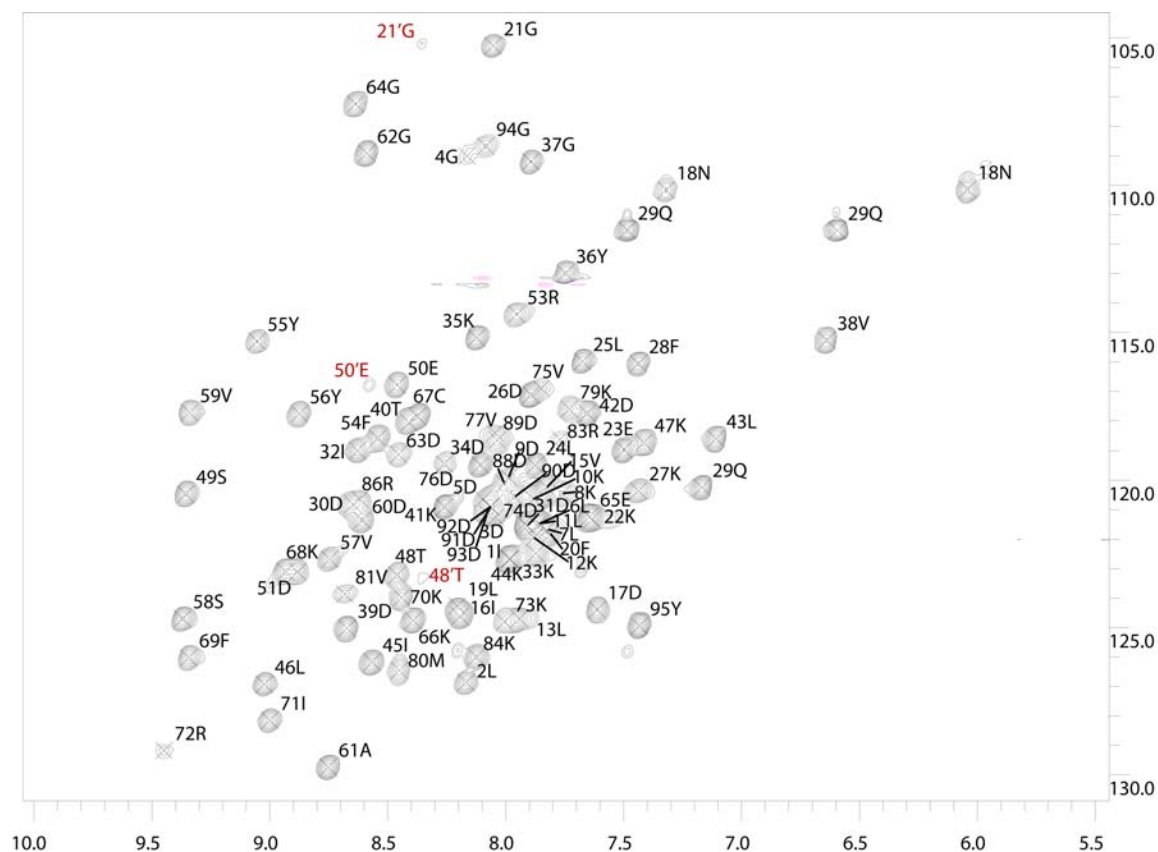

**Figure S3:**  $^{15}\text{N}$ -HSQC of Rsn-2 recorded at 14.1 T, 308 K, 20 mM NaPi pH 7, 50 mM NaCl. The backbone and sidechain resonance assignments are indicated and the peaks corresponding to minor conformations of selected residues are highlighted in red. (Note added in proof: residue numbers shown here should be incremented by one to match PDB entries.)

**Table S2:** NMR and refinement statistics for Rsn-2

|                                                       | <b>Protein</b>                   |
|-------------------------------------------------------|----------------------------------|
| <b>NMR distance and dihedral constraints</b>          |                                  |
| Distance constraints                                  |                                  |
| Total NOE                                             | 2322                             |
| Ambiguous                                             | 999                              |
| Unambiguous                                           |                                  |
| Intra-residue                                         | 727                              |
| Sequential ( $ i - j  = 1$ )                          | 250                              |
| Medium-range ( $ i - j  < 4$ )                        | 110                              |
| Long-range ( $ i - j  > 5$ )                          | 236                              |
| Hydrogen bonds                                        | 17                               |
| <b>Structure statistics</b>                           |                                  |
| Violations (mean and s.d.)                            |                                  |
| Distance constraints (Å)                              | $0.061 \pm 1.95 \times 10^{-3}$  |
| Violations per structure ( $>0.5$ Å)                  | $4.24 \pm 1.36$                  |
| Max. distance constraint violation (Å)                | 0.94                             |
| Deviations from idealized geometry                    |                                  |
| Bond lengths (Å)                                      | $0.0458 \pm 1.28 \times 10^{-4}$ |
| Bond angles (°)                                       | $0.610 \pm 1.98 \times 10^{-2}$  |
| Improper (°)                                          | $1.92 \pm 1.12 \times 10^{-1}$   |
| Dihedral angle constraints (°)                        | $42.1 \pm 0.234$                 |
| Average r.m.s.d. to the unbiased mean structure** (Å) |                                  |
| Heavy                                                 | 1.24                             |
| Backbone                                              | 0.79                             |
| Ramachandran plot (% residues in)                     |                                  |
| Most favoured                                         | 66.1                             |
| Additionally allowed                                  | 26.8                             |
| Generously allowed                                    | 4.4                              |
| Disallowed                                            | 2.8                              |

\*\* r.m.s. deviation to the unbiased mean structure was calculated among 25 refined structures for residues 17-87.

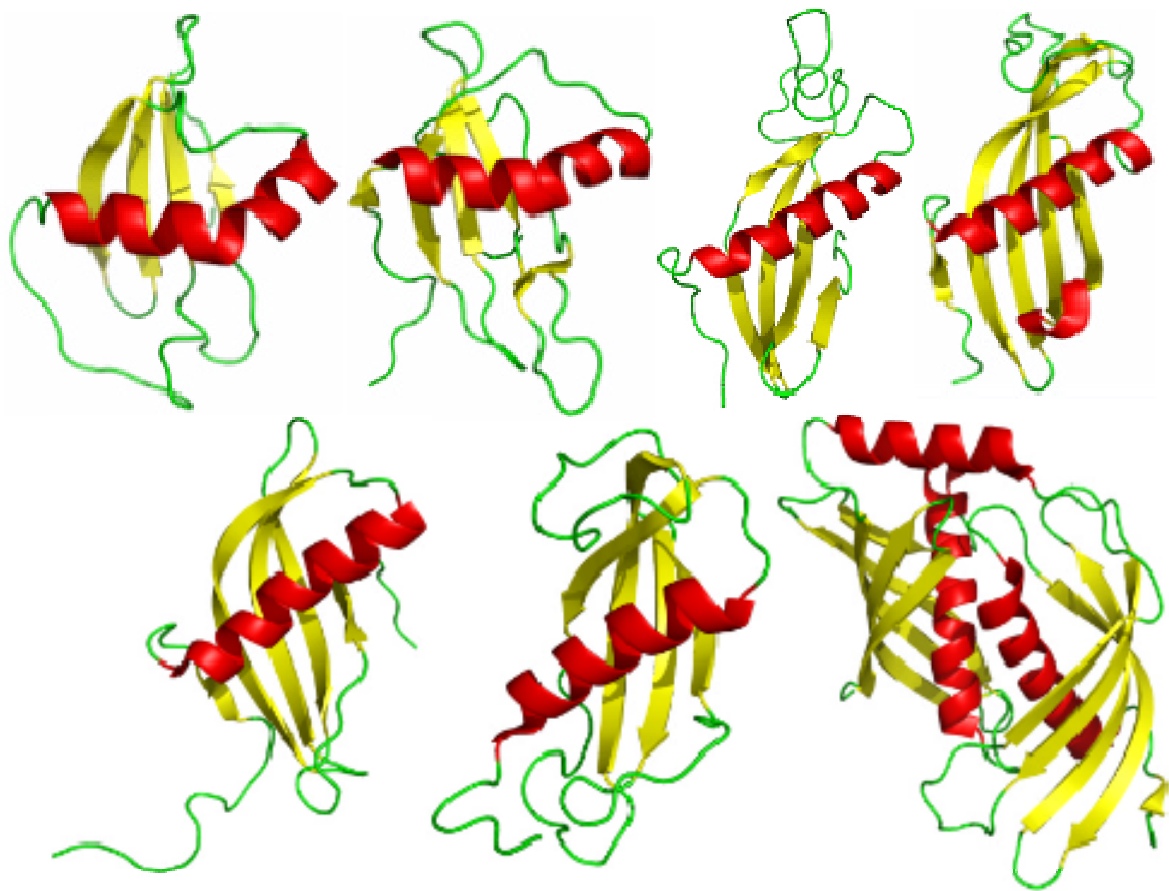

**Figure S4:** Comparison of Rsn-2 (top left) with structurally similar proteins from the Protein Data Base. From left to right, top to bottom: Rsn-2, human cystatin (stefin) A (1GD3), chicken egg white cystatin (1A67), human cystatin D (1RN7), rice oryzacystatin (1EQK), pig protegrin precursor (1N5H), and mouse latexin (1WNH).

From:

Shimba, N., Kariya, E., Tate, S., Kaji, H., Kainosho, M. (2000) Structural comparison between wild-type and P25S human cystatin A by NMR spectroscopy. Does this mutation affect the  $\alpha$ -helix conformation? *J.Struct.Funct.Genomics* 1: 26-42

Dieckmann, T., Mitschang, L., Hofmann, M., Kos, J., Turk, V., Auerswald, E.A., Jaenicke, R., Oschkinat, H. (1993) The structures of native phosphorylated chicken cystatin and of a recombinant unphosphorylated variant in solution. *J.Mol.Biol.* 234: 1048-1059

Alvarez-Fernandez, M., Liang, Y.H., Abrahamson, M., Su, X.D. (2005) Crystal structure of human cystatin D, a cysteine peptidase inhibitor with restricted inhibition profile. *J.Biol.Chem.* 280: 18221-18228

Nagata, K., Kudo, N., Abe, K., Arai, S., Tanokura, M. (2000) Three-dimensional solution structure of oryzacystatin-I, a cysteine proteinase inhibitor of the rice, *Oryza sativa* L. japonica. *Biochemistry* 39: 14753-14760

Yang, Y., Sanchez, J.F., Strub, M.P., Brutscher, B., Aumelas, A. (2003) NMR Structure of the Cathelin-like domain of the protegrin-3 Precursor *Biochemistry* 42: 4669-4680

Aagaard, A., Listwan, P., Cowieson, N., Huber, T., Ravasi, T., Wells, C.A., Flanagan, J.U., Kellie, S., Hume, D.A., Kobe, B., Martin, J.L. (2005) An Inflammatory Role for the Mammalian Carboxypeptidase Inhibitor Latexin: Relationship to Cystatins and the Tumor Suppressor TIG1 *Structure* 13: 309-317
